# Supplementary material
Source: publisher site journal article supplement (https://www.dovepress.com/article/419348)
Supplement: Supplementary file 1 [file get_supplementary_file.php]

**Table S1.** Univariable Cox proportional hazards analysis of predictors of unfavorable outcomes in patients on second-line ART in ACSH and MH, Ethiopia between 2009 and 2020.

| Variables | Unfavorable outcomes | | Unadjusted HR  (95% CI) | p-value |
| --- | --- | --- | --- | --- |
| No | Yes |
| Gender |  |  |  |  |
| Male | 58 | 53 | Ref |  |
| Female | 52 | 29 | 0.66(0.42,1.04) | 0.076 |
| Age |  |  |  |  |
| 15-29 | 21 | 11 | Ref |  |
| 30-39 | 46 | 22 | 0.96(0.46, 1.98) | 0.905 |
| 40-49 | 31 | 33 | 1.91 (0.96, 3.79) | 0.065 |
| >=50 | 12 | 16 | **2.21 (1.02, 4.81)*** | **0.045** |
| Marital Status |  |  |  |  |
| Never | 25 | 16 | 1 |  |
| Married | 44 | 38 | 1.32(0.73,2.41) | 0.359 |
| Separated | 25 | 23 | 1.41(0.73,2.72) | 0.299 |
| Divorced | 16 | 5 | 0.74(0.28,1.91) | 0.528 |
| Educational level |  |  |  |  |
| No education | 17 | 12 | 0.77(0.34, 1.74) | 0.531 |
| Primary | 35 | 26 | 1.06(0.53, 2.10) | 0.875 |
| Secondary | 38 | 32 | 1.10(0.56, 2.14) | 0.771 |
| diploma/ degree | 20 | 12 | Ref |  |
| Occupation |  |  |  |  |
| Merchant | 48 | 39 | 1 |  |
| Daily laborer | 36 | 25 | 0.90(0.55, 1.49) | 0.693 |
| Government employer | 14 | 12 | 1.35(0.70,2.59) | 0.368 |
| Other | 12 | 6 | 0.78(0.33,1.86) | 0.580 |
| BMI at switch |  |  |  |  |
| <18.5 | 73 | 72 | **2.48(1.28,4.82)*** | **0.007** |
| ≥18.5 | 37 | 10 | Ref |  |
| WHO T staging |  |  |  |  |
| Stage I/II | 39 | 19 | Ref |  |
| Stage III/IV | 71 | 63 | 0.73(0.47, 1.14) | 0.172 |
| CD4 count at switch |  |  |  |  |
| <100 | 30 | 36 | **1.97(1.26, 3.07)*** | **0.003** |
| ≥100 | 80 | 46 | Ref |  |
| First line ART |  |  |  |  |
| 1a | 34 | 30 | Ref |  |
| 1c | 37 | 25 | 0.81(0.47, 1.39) | 0.450 |
| 1e | 26 | 20 | 1.54(0.87, 2.75) | 0.138 |
| Others | 13 | 7 | 0.72(0.31, 1.64) | 0.436 |
| Type of PI |  |  |  |  |
| Dual NRTI + LPV/r | 65 | 55 | Ref |  |
| Dual NRTI + ATV/r | 45 | 27 | 1.43(0.89, 2.29) | 0.135 |
| Time on first ART |  |  |  |  |
| <5 | 51 | 33 | Ref |  |
| ≥5 | 59 | 49 | 1.36(0.87, 2.15) | 0.179 |

Notes: *Statistical significance at p-value <0.05. The values in bold font represent variables that are significantly associated with the unfavourable outcomes.

Abbreviations: HR = hazard ratio; 95% CI = 95% confidence interval; ART = antiretroviral treatment; WHO = World Health Organization; NRTI = nucleoside reverse-transcriptase inhibitors; TDF = tenofovir; AZT = zidovudine; 3TC = lamivudine; PI = protease inhibitor; LPV/r = lopinavir/ritonavir; ATV/r = atazanavir/ ritonavir; NVP = nevirapine; EFV = efavirenz
